Cannell, M.B., and C. Soeller.

*The Journal of General Physiology*. Volume 113, No. 3, March 1999. 373–376.

Page 374

Due to a typesetting error, an incorrect version of Eq. 1 was printed. It should appear as follows:

$$P_{\text{Spark}}/I_{\text{Ca}} = f(i) \cdot g(\tau)/n \cdot i = h(i) \cdot g(\tau) \quad (1)$$
